# Supplementary material for: Nrf2 Activation Does Not Protect from Aldosterone-Induced Kidney Damage in Mice
Source: MDPI journal article supplement (doi:10.3390/antiox12030777), 2023-03-22

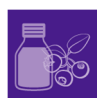

# Nrf2 activation does not protect from aldosterone-induced kidney damage in mice

## Supplemental material

**Table S1.** List of oligonucleotides used for genotyping.

| Gene               | Gene ID   | Forward (5'-)          |
|--------------------|-----------|------------------------|
| <i>Keap1-720s</i>  | JN957436  | CAGCAGTTAAGGGCACCAATGC |
| <i>Keap1-925as</i> | JN957436  | CCTGCCTCAGCTTCCCATCA   |
| <i>CKOg1</i>       | OK586152  | CAACGAGAAGCGCGATCACA   |
| <i>Cre1</i>        | NC_005856 | ACGTTACCGGCATCAACGT    |
| <i>Cre2</i>        | NC_005856 | CTGCATTACCGGTCGATGCA   |

**Table S2.** Primers used for qRT-PCR.

| Gene           | Gene ID   | Forward (5'-)        | Reverse (5'-)               |
|----------------|-----------|----------------------|-----------------------------|
| <i>β-actin</i> | NM_007393 | GCATTGCTGACAGGATGCAG | CCTGCTTGCTGATCCACATC        |
| <i>Gapdh</i>   | NM_008084 | TCTCCTGCGACTTCAACA   | TCTCTTGCTCAGTGTCTT          |
| <i>Gclm</i>    | NM_008129 | TTCTCGGGTGAGGTTTCTGC | AACGAGGGAGCTGTTTCCTG        |
| <i>Gpx1</i>    | NM_008160 | TTGGTGATTACTGGCTGC   | TGATATTCAGCACTTTATTCTTAGTAG |
| <i>Ho-1</i>    | NM_010442 | CCAGAGTCCCTCACAGAT   | CCCAAGAGAAGAGAGCCA          |
| <i>Keap1</i>   | NM_016679 | ACGACGTGGAGACAGAGACC | ATCAATTTGCTTCCGACAGG        |
| <i>Nox2</i>    | NM_007807 | GCGGTGTGCAGTGCTATCAT | GGTTCAGTGCGTGTGCT           |
| <i>Nqo1</i>    | NM_008706 | GGCCGATTCAGAGTGGCAT  | CCAGACGGTTTCCAGACGTT        |
| <i>Nrf2</i>    | NM_010902 | GCAACTCCAGAAGGAACAGG | AGGCATCTTGTTTGGCAATG        |
| <i>Sod1</i>    | NM_011434 | ACCAGTTGTGTTGTCAGG   | TTTCTTAGAGTGAGGATTAATGAG    |
| <i>TrxR1</i>   | NM_015762 | CAGTTCGTCCCAACGAAAAT | GCACATTGGTCTGCTCTTCA        |

Copyright: © 2022 by the authors. Submitted for possible open access publication under the terms and conditions of the Creative Commons Attribution (CC BY) license (<https://creativecommons.org/licenses/by/4.0/>).

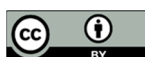

Supplement: s1 [file s1]
